# Supplementary material for: Influence of Different Construction Methods on Lateral Displacement of Diaphragm Walls in Large-Scale Unsupported Deep Excavation
Source: MDPI journal article supplement (doi:10.3390/buildings14010023), 2023-12-21
Supplement: s1 [file s1]

Archive with 1 entries (1 files):
- buildings-2775561-supplementary.pdf
