# Supplementary material for: Influence of Different Construction Methods on Lateral Displacement of Diaphragm Walls in Large-Scale Unsupported Deep Excavation
Source: MDPI journal article supplement (doi:10.3390/buildings14010023), 2023-12-21
Supplement: s1 [file s1 › buildings-2775561-supplementary.pdf]

## Supplementary Material

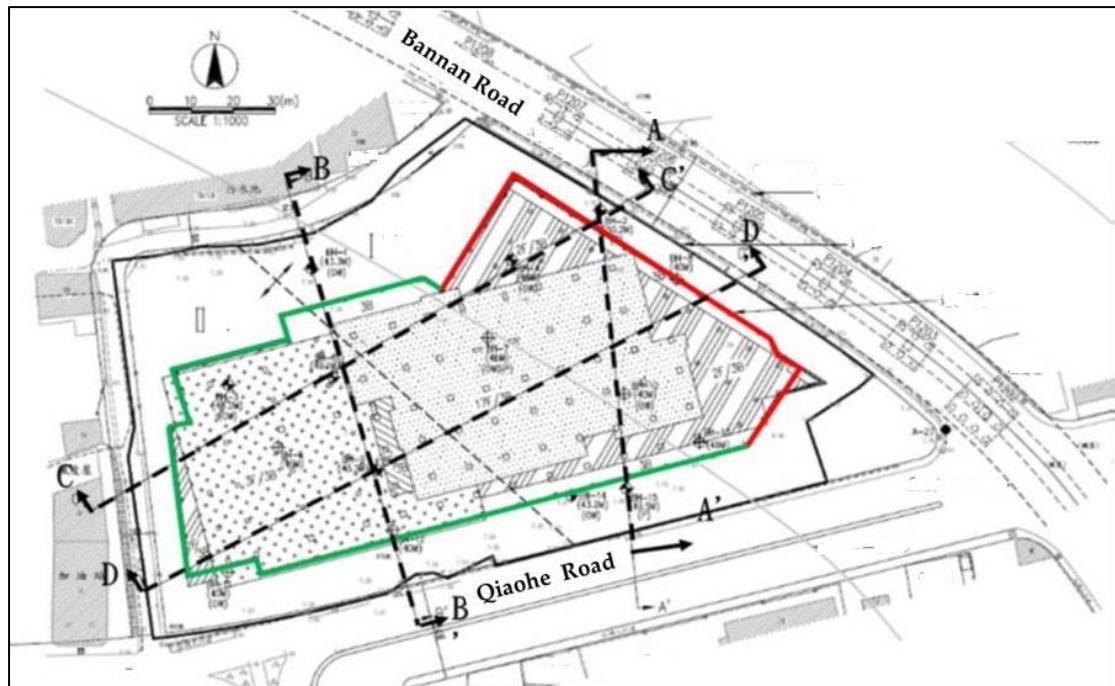

Figure S1. Location Map of Borehole Profiles on the Site.

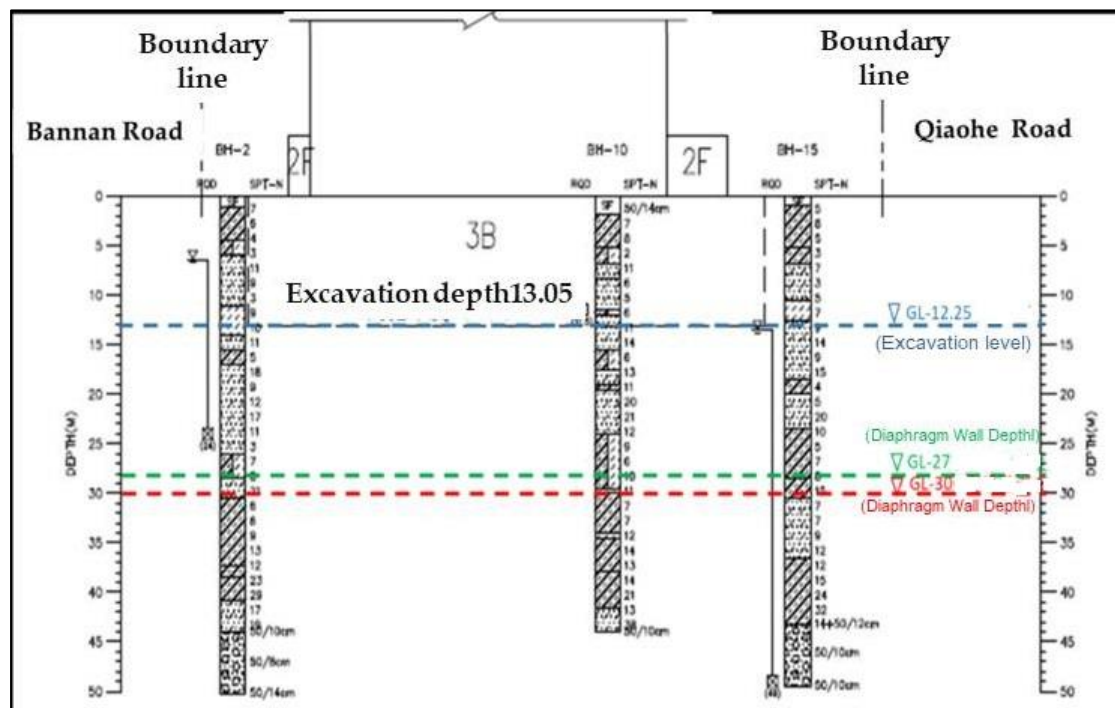

Figure S2. Columnar Section Diagram of Borehole A-A'.

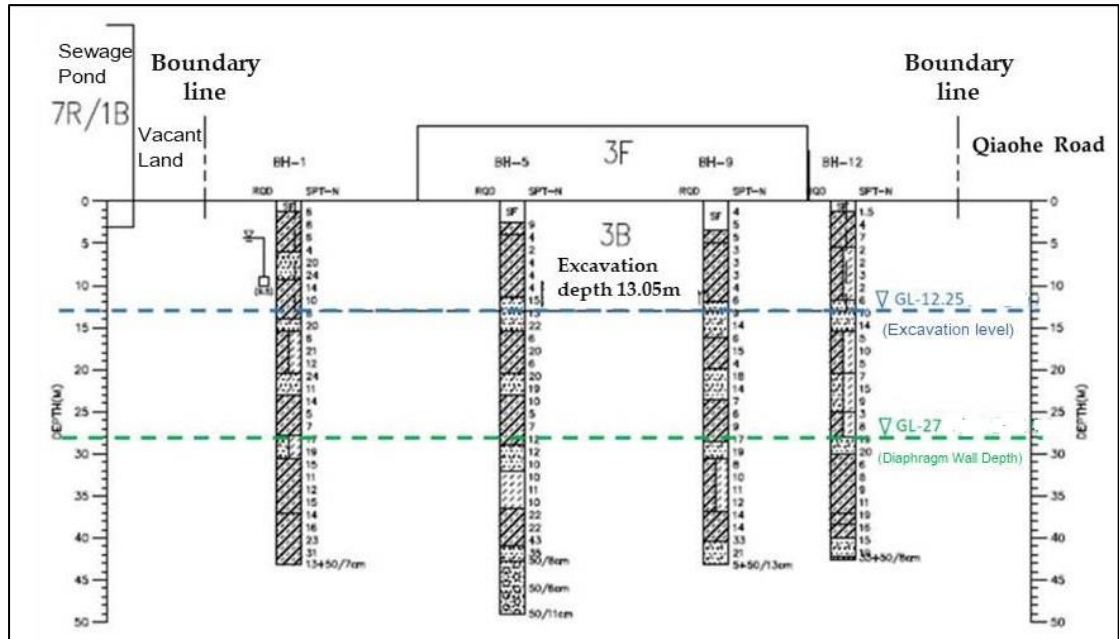

Figure S3. Columnar Section Diagram of Borehole B-B'

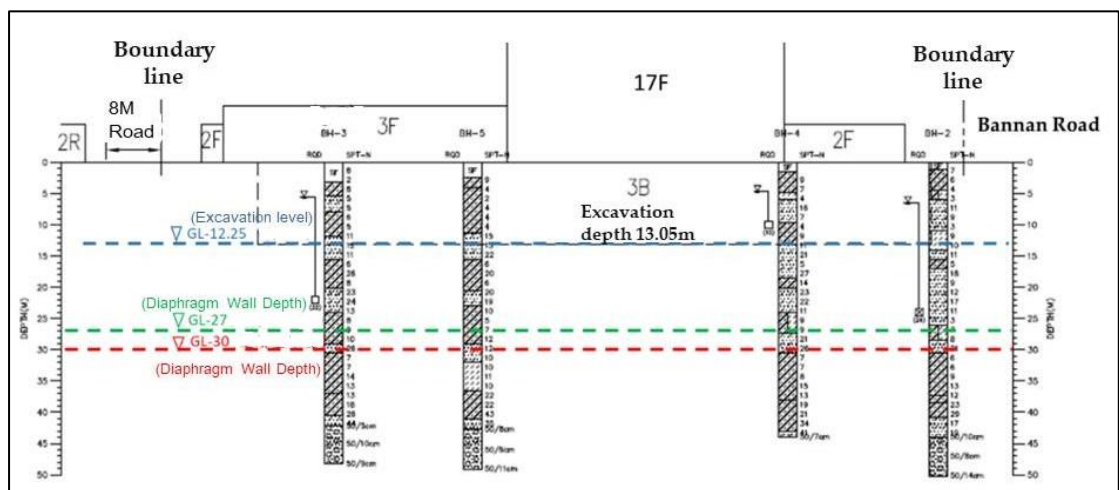

Figure S4. Columnar Section Diagram of Borehole C-C'

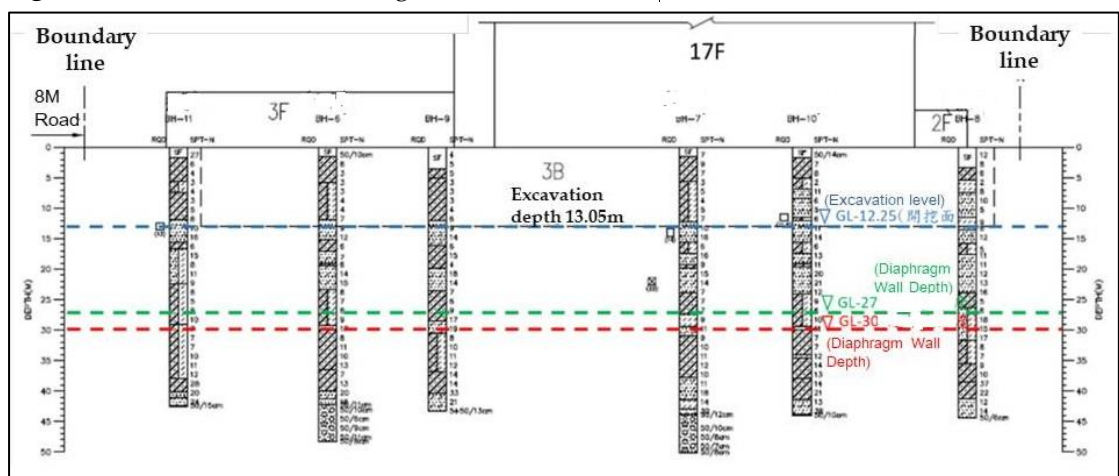

Figure S5. Columnar Section Diagram of Borehole D-D'

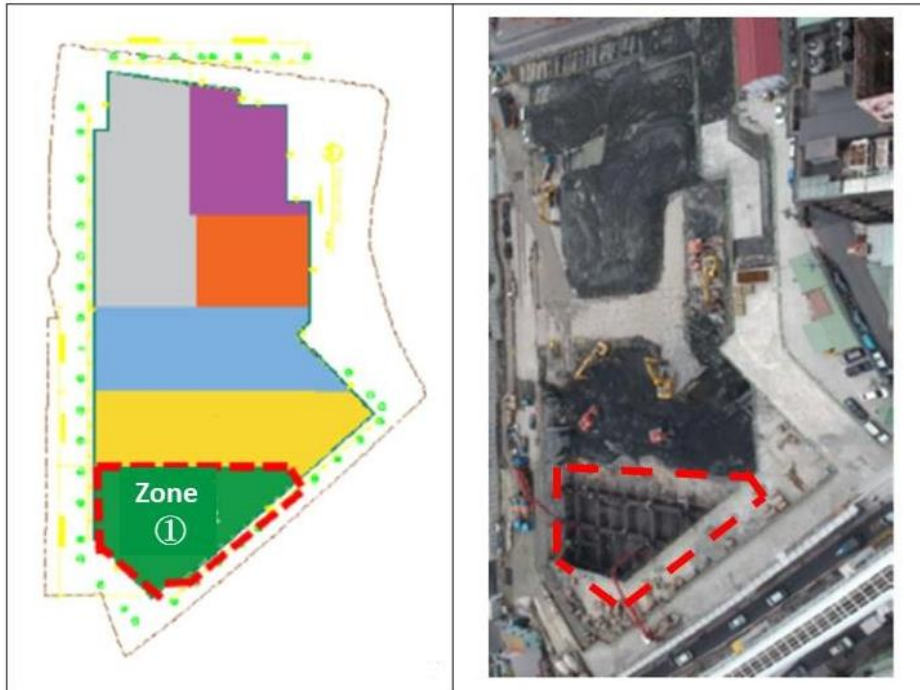

**Figure S6.** Construction Status Map of Zone 1

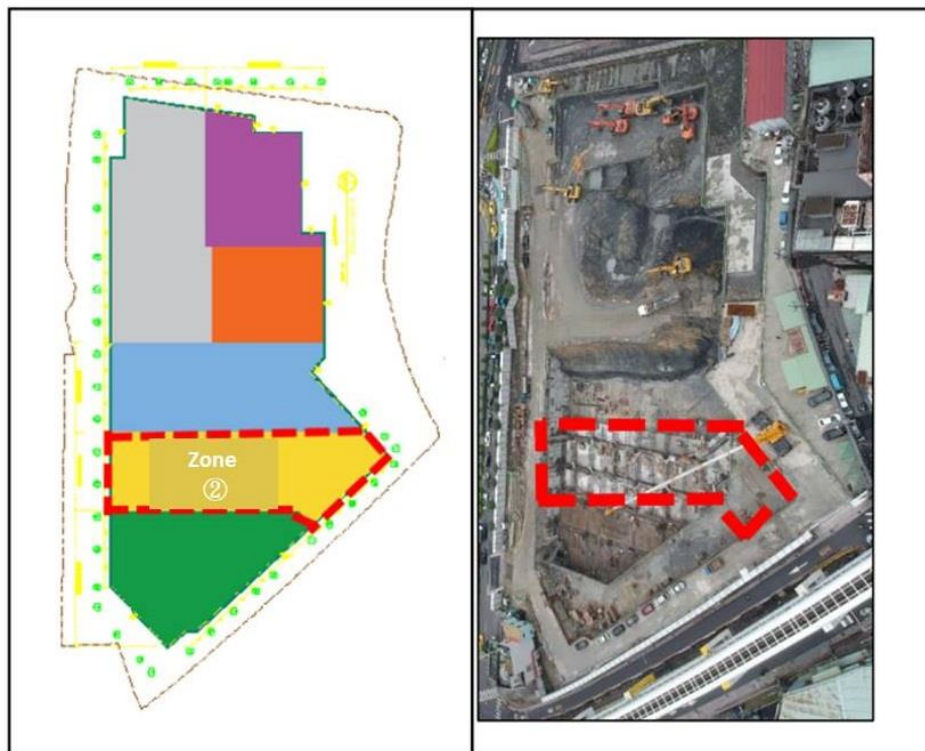

**Figure S7.** Construction Status Map of Zone 2

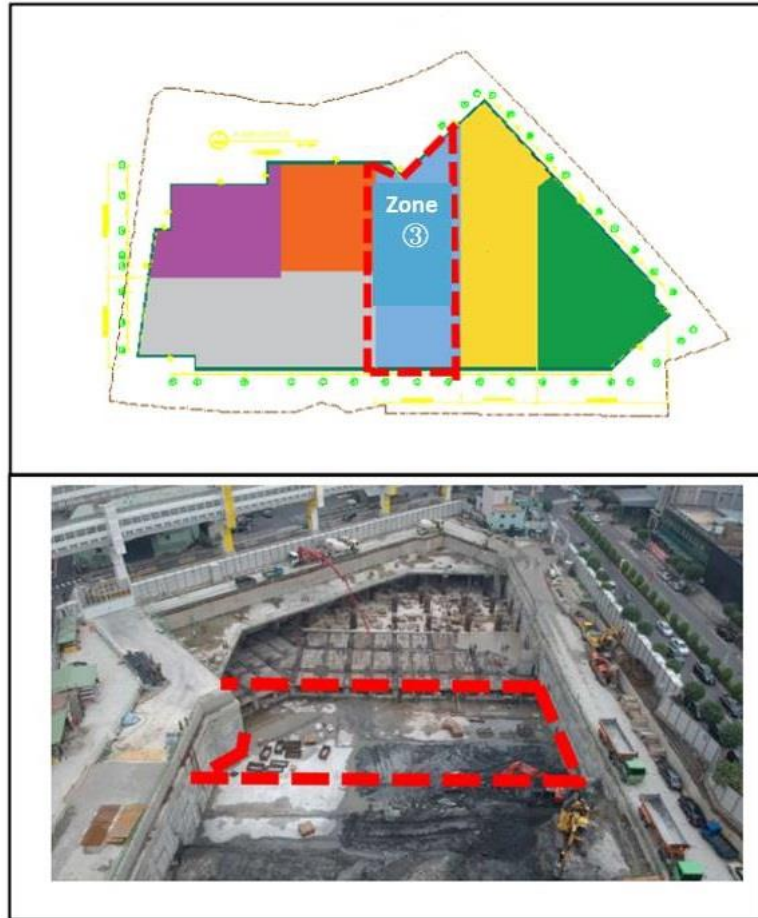

**Figure S8.** Construction Status Map of Zone 3

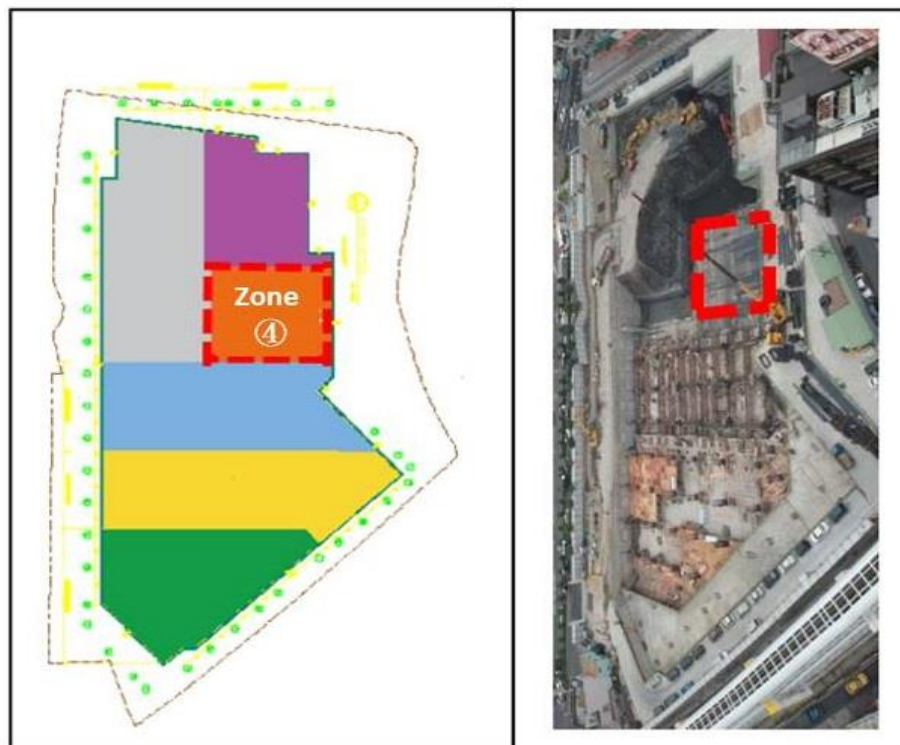

**Figure S9.** Construction Status Map of Zone 4

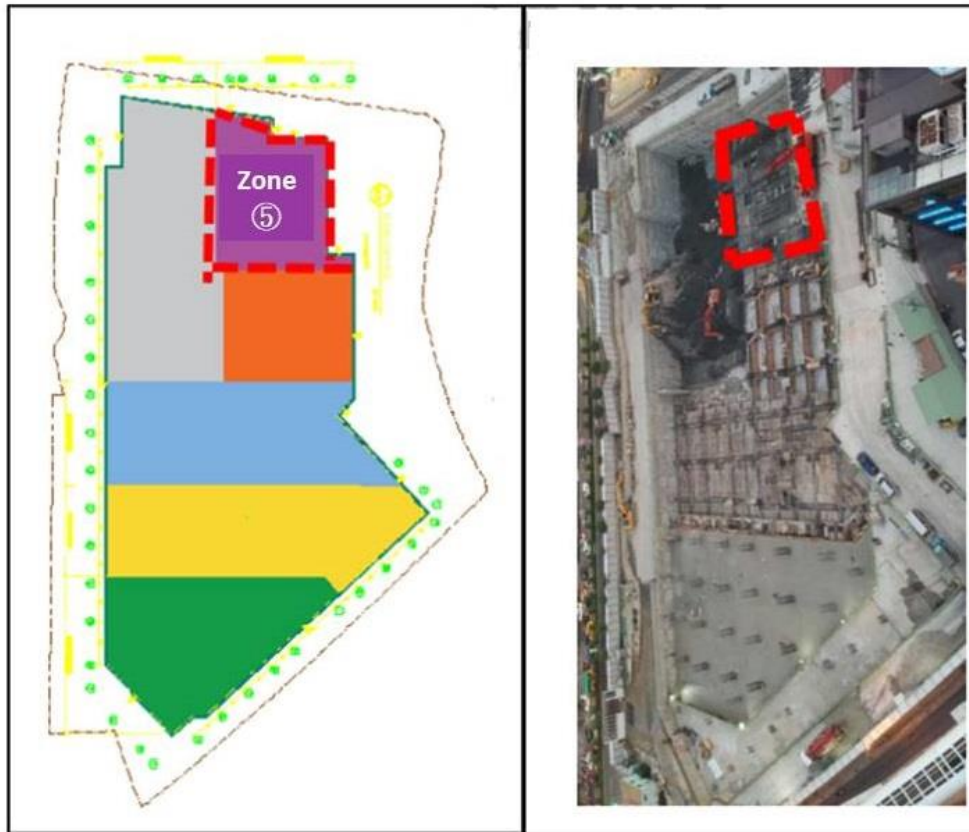

**Figure S10.** Construction Status Map of Zone 5

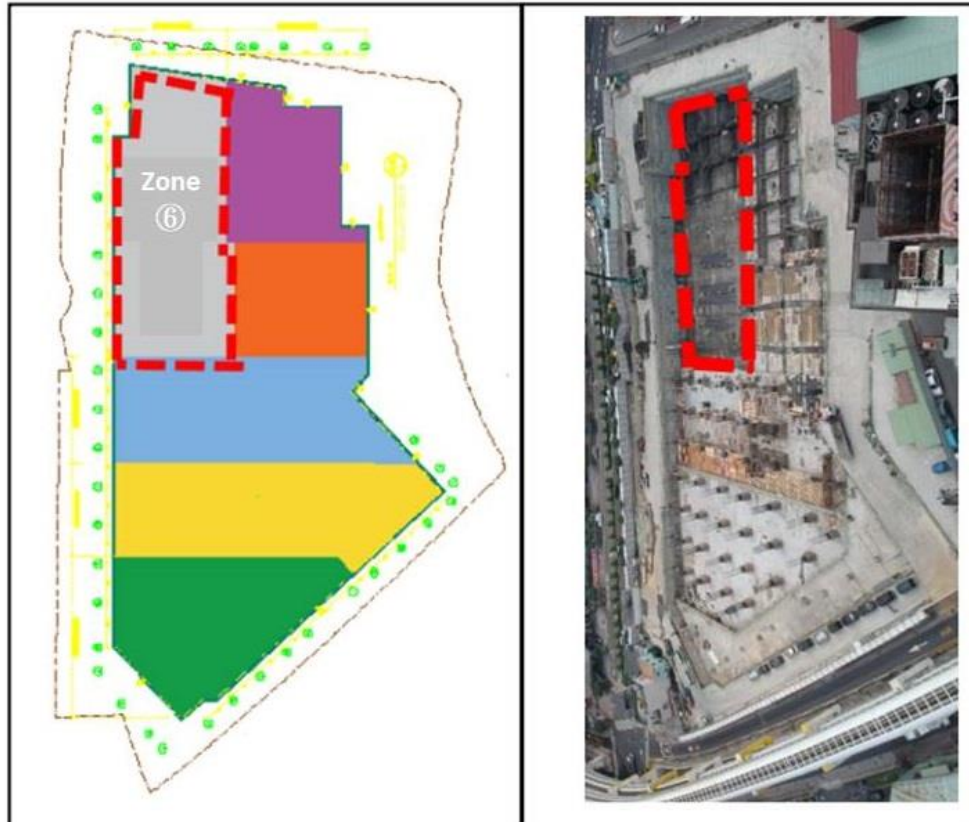

**Figure S11.** Construction Status Map of Zone 6
